# Supplementary material
Source: PubMed Central journal article supplement (PMC3320174)
Supplement: supp_pp.111.191965_191965Revision_Supplemental_Datapdf.pdf [file supp_pp.111.191965_191965Revision_Supplemental_Datapdf.pdf]

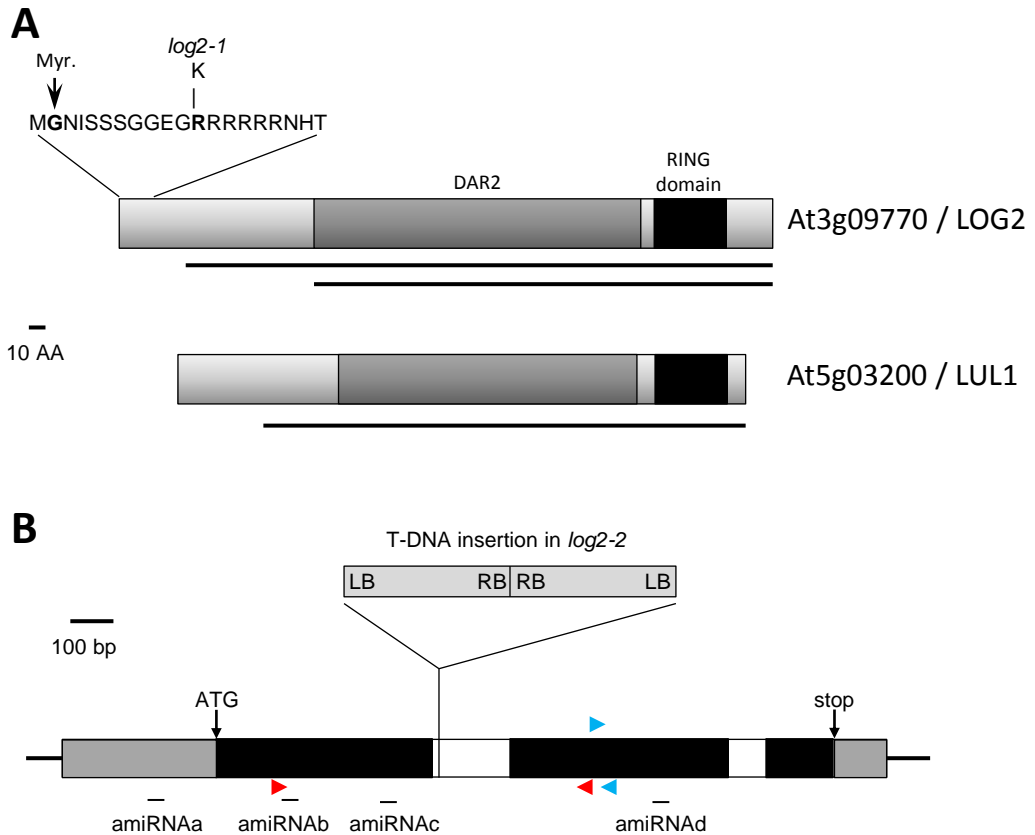

**Supplemental Fig. S1. Structure of LOG2 and LUL1 proteins, LOG2 gene, and multiple sequence alignment of LOG2, LULs and MGRN proteins.**

**A. Schematic of LOG2 and LUL1 proteins identified by the yeast-two-hybrid screening.** The lines below each diagram represent the parts encoded by the plasmids isolated from the yeast-two-hybrid screening. The amino sequence at the N-terminus is shown for LOG2 with position of the *log2-1* mutation indicated. Myr, predicted myristoylation site; DAR2 (Domain Associated with RING #2), also found in mammalian MGRN1.

**B. Representation of LOG2 gene.** Coding exons, introns and predicted UTRs are designated with black boxes, white boxes, and grey boxes, respectively. The position of the amiRNAs are indicated with black lines under the diagram. Arrowheads represent the oligonucleotides used for quantitative (blue) and semi-quantitative (red) PCR. LB and RB, left and right border of T-DNAs. The position of T-DNA insertion (SAIL\_729\_A08, between 519 and 533 bp downstream from LOG2 ATG) was verified by sequencing border PCR fragments.

C

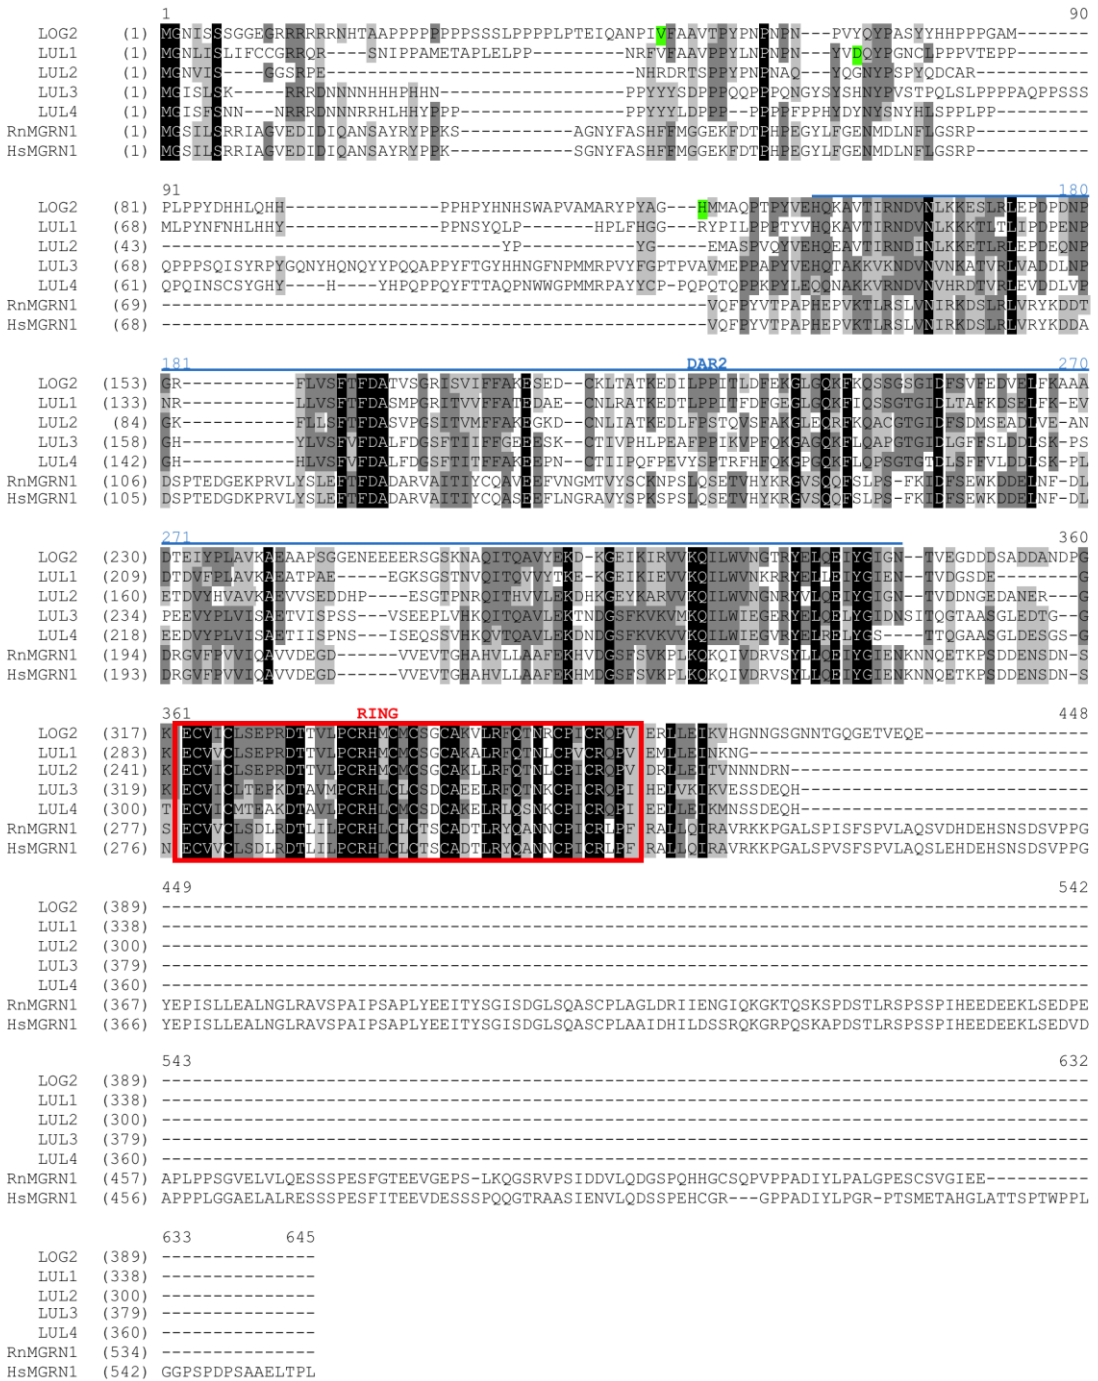

Supplemental Fig. S1 (continued). Structure of LOG2 and LUL1 proteins, LOG2 gene, and multiple sequence alignment of LOG2, LULs and MGRN proteins.

C. Multiple sequence alignment the Arabidopsis LOG2, LULs and rat and human MGRN1 proteins (NM\_001013964 and NM\_001142289). The DAR2 and RING domains are indicated in blue and red, respectively. The start of the clones isolated by the yeast-two-hybrid screening are indicated in green. The sequence alignment was generated by CLUSTALX2 (Larkin, MA et al. (2007) Clustal W and Clustal X version 2.0. Bioinformatics, 23:2947-2948).

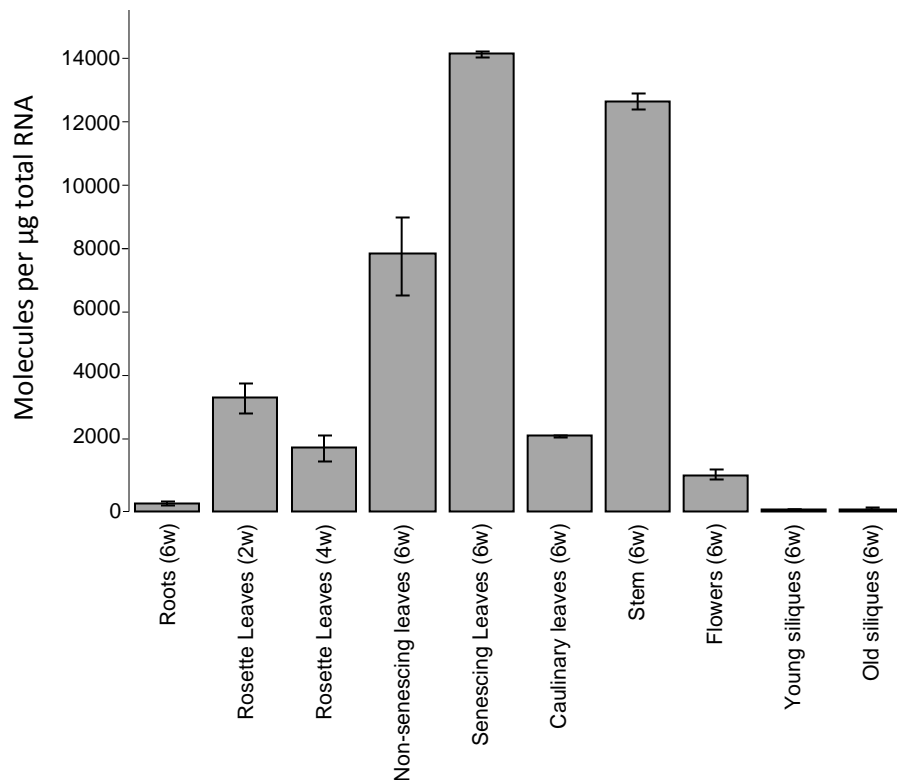

**Supplemental Figure S2: Accumulation of *LOG2* mRNA in the organs of the plant.**

Absolute expression was determined by comparing the Ct values of the quantitative RT-PCR (qRT-PCR) performed on mRNA extracted from the various organs and the Ct values of the q-PCR performed on dilutions of a plasmid containing *LOG2* coding sequence. 2w: 2-week old plants; 4w: 4-week old plants; 6w, 6-week old plants; “Flowers” correspond to the organs in the top 1 cm of the inflorescence; “Young siliques,” less than one-week old siliques; “Old siliques,” green siliques older than one week. Error bars correspond to the values of two technical replicates.

**A**

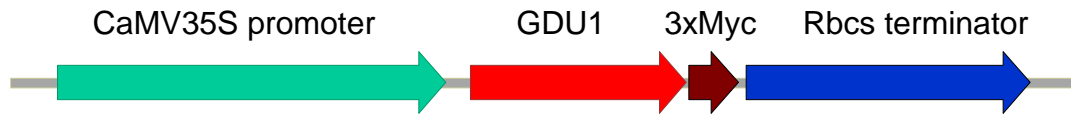

**B**

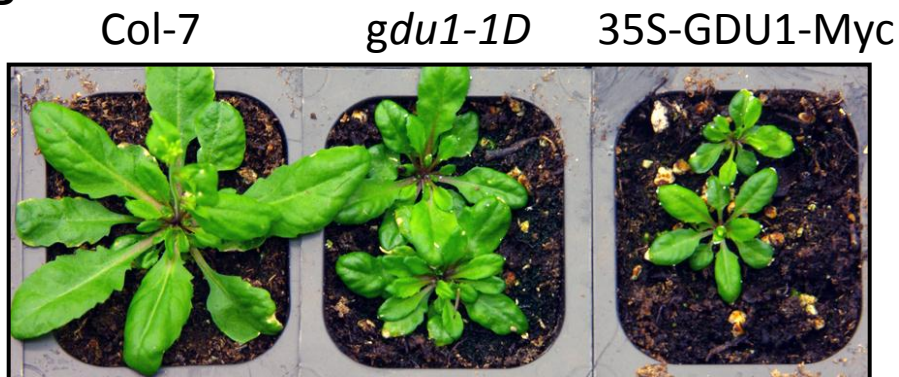

**Supplemental Figure S3. Phenotype of the 35S-GDU1-Myc line.**

**A. Schematic of the over-expression construct.** This construct was inserted in Col-7 genome to generate the 35S-GDU1-Myc line.

**B. Phenotype of 4-week old 35S-GDU1-Myc line, compared to *gdu1-1D* and the parent (Col-7).**

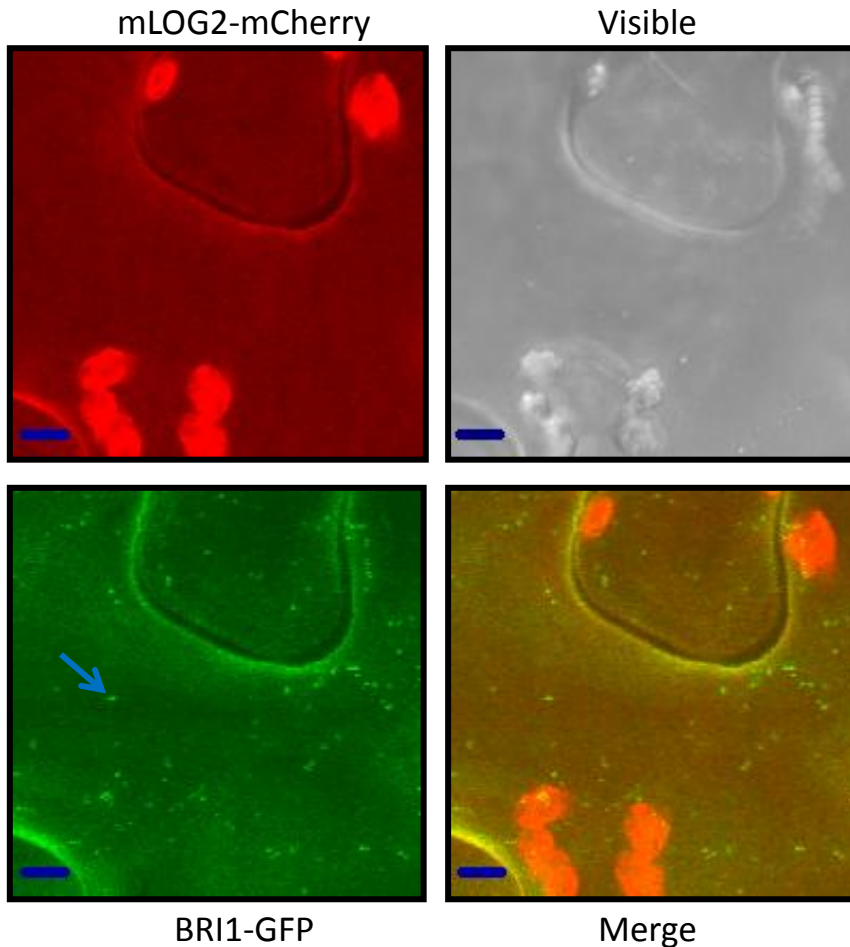

**Supplemental Figure S4. Co-localization of mLOG2 and BRI1 in *N. benthamiana* epidermis cells**

mLOG2-mCherry and BRI1-GFP (Friedrichsen DM, Joazeiro CA, Li J, Hunter T, Chory J (2000) *Plant Physiol.* **123**: 1247-1256) were co-infiltrated in *N. benthamiana* epidermis cells and observed by confocal microscopy. The bright dots in the green channel (arrow) correspond to endosomes, since the BRI1 protein has been shown to localize at the plasma membrane and endosomal compartments (Geldner N, Hyman DL, Wang X, Schumacher K, Chory J (2007) *Genes Dev.* **21**: 1598-1602). Maximal projections of optical sections of the abaxial side of the cell. Bar = 5 µm.

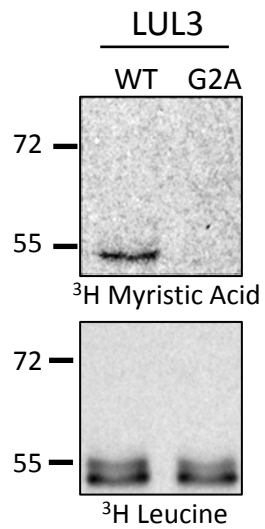

**Supplemental Figure S5. LUL3 can be myristoylated *in vitro*.**

LUL3 and can be myristoylated in rabbit reticulocyte lysates, while the corresponding G2A mutant cannot be myristoylated.

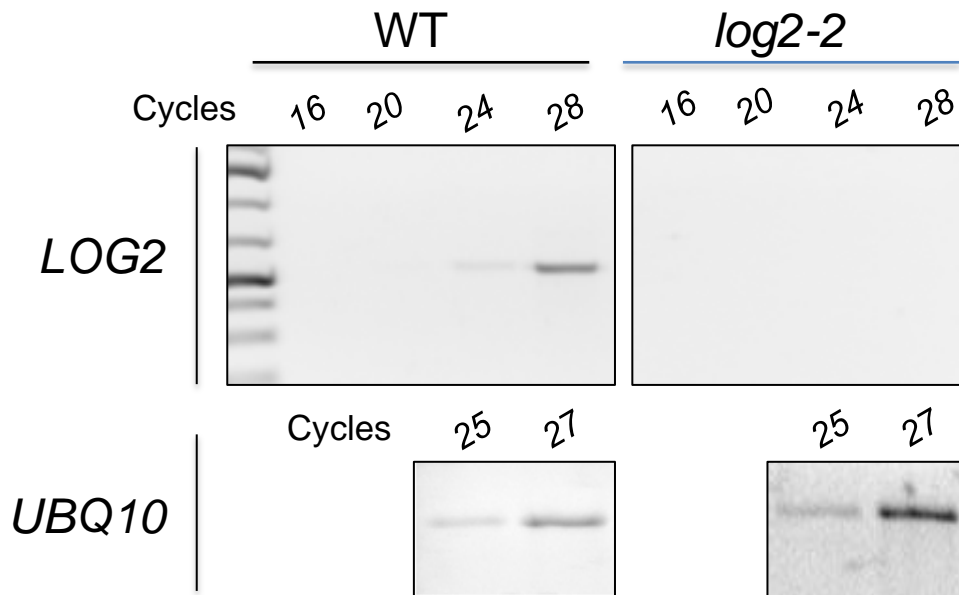

**Supplemental Figure S6. Suppression of wild type *LOG2* transcript accumulation in *log2-2*.**

Semi-quantitative PCR was performed with intron-spanning primers from reverse-transcribed RNA extracted from 6-day old liquid-grown WT or *log2-2* seedlings. *UBQ10* transcript served as control.

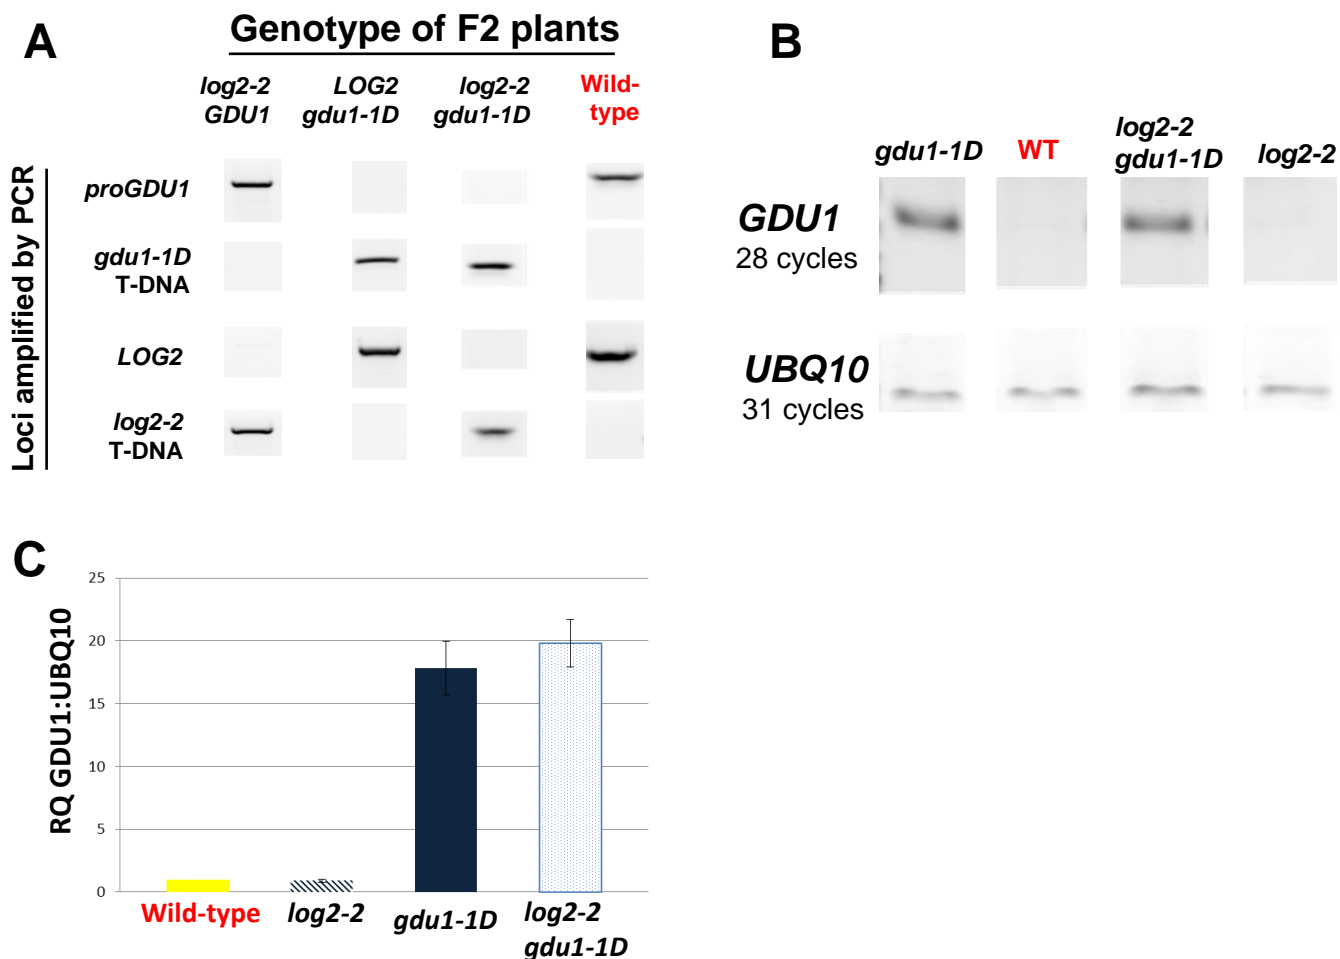

**Supplemental Figure S7. *GDU1* transcript accumulation in F2 plants descended from the *gdu1-1D* x *log2-2* cross.**

**A. Deduced genotypes of F2 plants from the *gdu1-1D log2-2* cross.** The indicated gDNA regions were PCR-amplified with primers specific to each locus. *proGDU1*: *GDU1* native promoter. *gdu1-1D* T-DNA: T-DNA in the *GDU1* promoter harboring 4 copies of the 35S enhancer that gives rise to the *Gdu1D* phenotype.

**B. *GDU1* transcript levels are not affected by the *log2-2* mutation.** *GDU1* transcript was PCR amplified from first-strand cDNA synthesized from total RNA extracted from 6-day old liquid-grown plants. *UBQ10* transcript served as a control.

**C. Relative quantitation of *GDU1* transcript abundance by the efficiency-calibrated qPCR model.** Each bar represents the abundance of *GDU1* transcript (relative to *UBQ10* transcript) derived from three cDNA samples. Error bars correspond to standard error of three biological replicates.



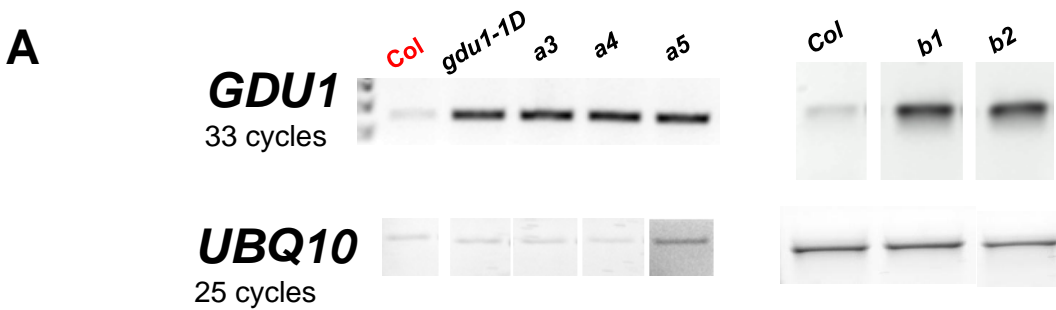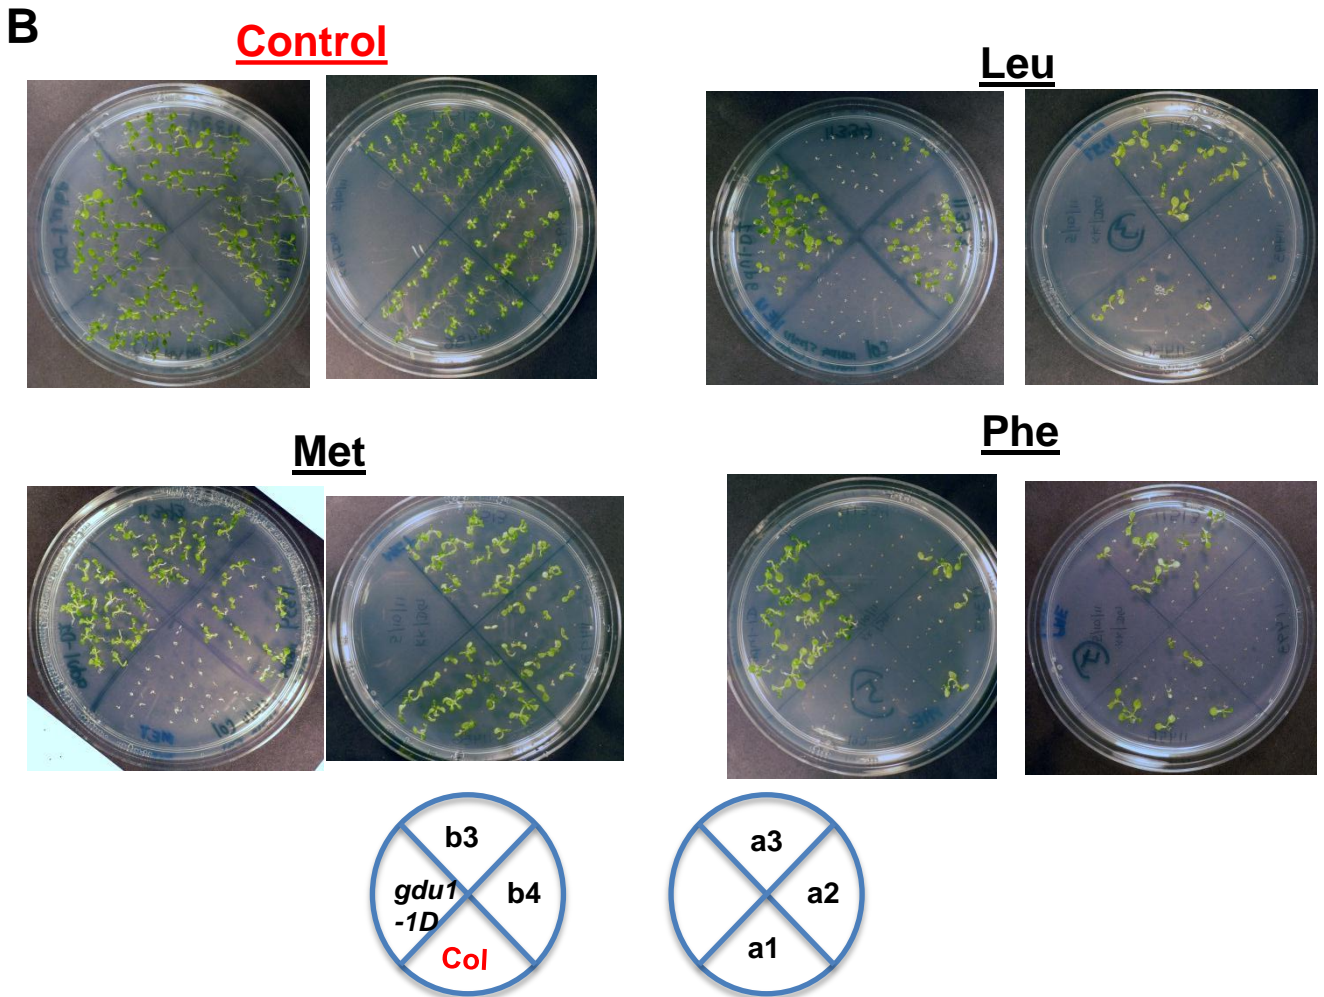

**Supplemental Figure S8. *GDU1* transcript accumulation and amino acid sensitivity phenotypes of *gdu1-1D* plants over-expressing the *LOG2-miRNA*.**

**A.** *GDU1* transcript levels are not affected by the over-expression of *LOG2-miRNA*a and **b.** *GDU1* transcript was PCR amplified from first-strand cDNA synthesized from total RNA extracted from 6-day old liquid-grown plants. a3-5, b1-2: plants expressing amiRNA “a” or “b” in the *gdu1-1D* background. *UBQ10* transcript served as a control.

**B.** *LOG2*-directed artificial microRNAs “a” and “b” partially suppressed the amino acid resistance phenotype conferred by *GDU1* over-expression. Experiments were repeated three or more times with 25 seeds from each line. Each plate is oriented with quadrants as shown in the model.

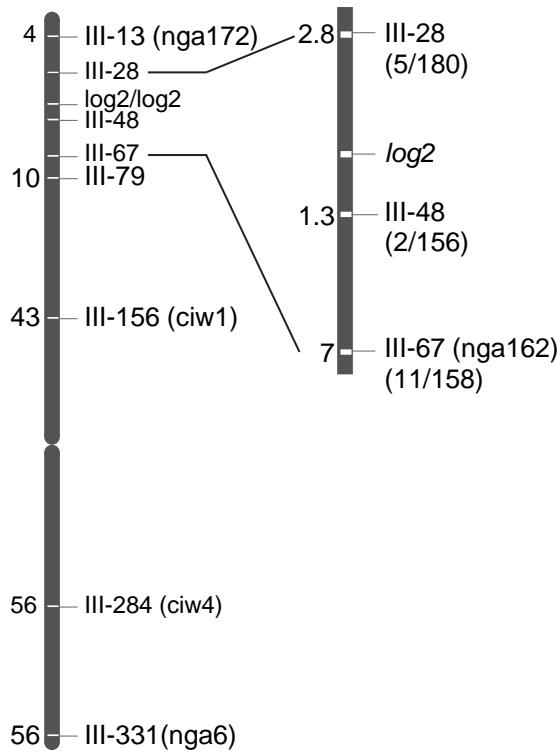

**Supplemental Figure S9: Positional cloning of *log2-1*.**

The position of the single sequence length polymorphism markers used for the localization of *log2-1* are indicated on the physical map of the Arabidopsis chromosome 3. The numbers on the left indicate the percentage of recombination between *log2-1* and the corresponding markers. The numbers of observed recombination events are indicated in parentheses for markers III-28, III-48 and III-67.

**Supplemental Table S1:** Free amino acid content of plants over-expressing *LOG2-amiRNA*.

Free amino acid content in rosette leaves of 4-week old wild type, 35S-GDU1-Myc and two lines over-expressing *LOG2-amiRNA*b in the 35S-GDU1-Myc background showing wild type phenotype. Means  $\pm$  SD of three biological replicates are shown. Significant differences from the wild type (*t* test) are as follows: \*  $P < 0.05$ , \*\*  $P < 0.005$ .

|              | Ala   | Arg   | Asn     | Asp      | Gln      | Glu       | His     | Ile   | Leu   | Phe     | Pro   | Ser   | Thr   | Trp     | Tyr     | Val     | sum       |
|--------------|-------|-------|---------|----------|----------|-----------|---------|-------|-------|---------|-------|-------|-------|---------|---------|---------|-----------|
|              | 6.9   | 1.2   | 4.1     | 9.8      |          |           |         | 0.5   | 0.6   | 1.9     | 1.8   | 15.1  | 5.1   |         |         |         |           |
| Wild type    | $\pm$ | $\pm$ | $\pm$   | $\pm$    | 28.5     | 29.1      | 0.4     | $\pm$ | $\pm$ | $\pm$   | $\pm$ | $\pm$ | $\pm$ | 0 $\pm$ | 0.1     | 0.3     | 105.3     |
|              | 0.4   | 0.3   | 0.4     | 1.4      | $\pm$ 6  | $\pm$ 7.9 | $\pm$ 0 | 0.1   | 0.1   | 0.6     | 0.4   | 2.7   | 0.9   | 0       | $\pm$ 0 | $\pm$ 0 | $\pm$ 2.8 |
|              | 2.7   | 17.5  | 25.4    |          | 497.6    |           | 4.6     | 2.4   | 2.3   |         |       |       |       | 0.6     |         | 0.9     | 830.2     |
| 35S-GDU1-Myc | $\pm$ | $\pm$ | $\pm$   | 8.7      | $\pm$    | 113.5     | $\pm$   | $\pm$ | $\pm$ |         | 128   | 13.4  | 8.8   | $\pm$   | 0.8     | $\pm$   | $\pm$     |
|              | 0.3   | 2.8   | 0.9     | $\pm$    | 36.8     | $\pm$ 3.8 | 0.3     | 0.5   | 0.4   | 3 $\pm$ | $\pm$ | $\pm$ | $\pm$ | 0.1     | $\pm$ 0 | 0.1     | 80.1      |
|              | **    | **    | **      | 0.8      | **       | **        | **      | **    | **    | 0.2     | 44.8  | 1.3   | 2.9   | **      | **      | **      | **        |
|              | 2.4   |       | 22.8    |          |          |           |         | 1.8   |       |         |       |       |       |         | 0.5     |         |           |
| 249A         | $\pm$ | 2.8   | $\pm$   |          | 248.7    | 110.7     | 1.2     | $\pm$ | 1.2   | 1.8     | 6.8   | 17.6  | 10.2  |         | $\pm$   | 0.3     |           |
|              | 0.3   | $\pm$ | 4.2     | 16 $\pm$ | $\pm$    | $\pm$     | $\pm$   | 0.6   | $\pm$ | $\pm$   | $\pm$ | $\pm$ | $\pm$ | 0.2     | 0.2     | $\pm$   | 445 $\pm$ |
|              | **    | 0.3   | **      | 2.3      | 21.5     | 40.3      | 0.1     | **    | 0.1   | 0.5     | 2.4   | 4.2   | 1.8   | $\pm$ 0 | **      | 0.1     | 69.5      |
|              | 2.1   |       |         |          |          |           |         | 0.5   |       |         |       |       | 6.2   |         |         |         |           |
| 249B         | $\pm$ | 1.8   | 10.5    | 9.4      |          | 83.9      | 0.8     | $\pm$ | 0.8   | 0.9     | 4.3   | 14.1  | $\pm$ |         | 0.1     |         | 212.4     |
|              | 0.3   | $\pm$ | $\pm$ 1 | $\pm$    | 76.6     | $\pm$     | $\pm$   | 0.1   | $\pm$ | $\pm$   | $\pm$ | $\pm$ | 0.1   | 0.1     | $\pm$ 0 | 0.3     | $\pm$     |
|              | **    | 0.7   | **      | 1.1      | $\pm$ 10 | 11.8      | 0.1     | **    | 0.1   | 0.1     | 1.8   | 1.7   | **    | $\pm$ 0 | **      | $\pm$ 0 | 18.3      |

<sup>a</sup>nmol mg<sup>-1</sup> DW.

Supplemental Table S2. Sequence of the oligonucleotides used for this study.

| Name               | Sequence(5'-3')                                                     | Purpose                                                     | Direction |
|--------------------|---------------------------------------------------------------------|-------------------------------------------------------------|-----------|
|                    | GGGGACAAGTTTGTACAAAAAAGCAGGCTCGGAAGGAGATATACATATGGGAAACATTAGCAGCAGC | Addition of Kozak sequence to LOG2 for myristoylation assay | FWD       |
|                    | GGGGACAAGTTTGTACAAAAAAGCAGGCTGAAGGAGATATACATACATGGGAAACATTAGCAGCAGC | Addition of Shine-Delgarno sequence to LOG2                 | FWD       |
|                    | GGGGACAAGTTTGTACAAAAAAGCAGGCTGAAGGAGATATACATACATGGGAAATCTGATCAGTTTG | Addition of Shine-Delgarno sequence to LUL1                 | FWD       |
| LOG2 -150 f        | CTAAACTCTCTCTGCTTTTCTT                                              | Amplification of LOG2 CDS from log2-1                       | FWD       |
| LOG2 BamXho r      | AAGGATCCCTCGATCCGCTCTTTGTAATCTCCA                                   | Amplification of LOG2 CDS from log2-1                       | REV       |
|                    | TAGCATCTGAATTCATAACCAATCTC                                          | Amplification of log2-2 SAIL_729 T-DNA junction             | REV       |
|                    | CCACCCAGGAGGAGCATC                                                  | Anneals to 35S promoter                                     | FWD       |
|                    | GCTGCACTGAGCAGCTAATC                                                | Anneals to 3xHA tag in pGWB14                               | REV       |
|                    | TTGGCCCAGCGCCGAGCAGCAGCAGGATCTTGATAGCCTGTCCA                        | Anneals to YFP tag in pEG101                                | REV       |
| GDU1 180 BE f      | TTTGGATCCAAGAATTCATGGCGCTGTCTCTCCCG                                 | Cloning cGDU1 in pGBT9 and pGBKT7                           | FWD       |
| GDU1 XbB r         | TTTGGATCCTTCTAGAGTGACTTGTAGTAGTTGTC                                 | Cloning cGDU1 in pGBT9 and pGBKT7                           | REV       |
| LOG2p Bam r 2      | AAAGGATCCTGGCGTTAAACCAGATCAAAAAGAC                                  | Cloning of LOG2 promoter                                    | FWD       |
| LOG2p Pst f 2      | TTTCTGCAGGGAACCTGCAATTTGGTGGAA                                      | Cloning of LOG2 promoter                                    | REV       |
|                    | GGGGACCACCTTTGTACAAGAAAGCTGGGTCTATTACCAGGATCATTAGCATC               | Deletion of RING finger domain of LOG2                      | FWD       |
| GDU1 Eco f         | TTGAATTCATGAAAAAGTGTACTGTTGGTGG                                     | Deletion of the VIMAG domain                                | FWD       |
| GDU1 Eco r         | TTGAATTCCTCGTAAGCTCCGTTG                                            | Deletion of the VIMAG domain                                | REV       |
| pRS300 attB1       | GACAAGTTTGTACAAAAAAGCAGGCTTACCCAAAACACACGCTCGG                      | Gateway cloning of amiRNA                                   | FWD       |
| pRS300 attB2       | GACCACTTTGTACAAGAAAGCTGGTACCCATGGCGATGCCCTTA                        | Gateway cloning of amiRNA                                   | REV       |
| LOG2 miRa f        | GATTAAGGAATACGAAAAGCAGTCTCTTTTGTATTCC                               | Gateway cloning of amiRNAa                                  | FWD       |
| LOG2 miRa r        | GACTGCTTTTTCGTAATCTTAATCAAGAGAATCAATGA                              | Gateway cloning of amiRNAa                                  | REV       |
| LOG2 miRa* f       | GACTACTTTTTCGTAATCTTAATCAAGAGTCTGATATG                              | Gateway cloning of amiRNAa                                  | FWD       |
| LOG2 miRa* r       | GAATAAGGATTTACGAAAAGTGTCTACATATATATCTCT                             | Gateway cloning of amiRNAa                                  | REV       |
| LOG2 miRb f        | GATATTAGGATAGGAGTACCGTCTCTCTTTTGTATTCC                              | Gateway cloning of amiRNAb                                  | FWD       |
| LOG2 miRb r        | GACCGTACTCCCTACTATATCAAGAGAATCAATGA                                 | Gateway cloning of amiRNAb                                  | REV       |
| LOG2 miRb* f       | GACCGTACTCCCTAACCTAATTTACAGGCTGTGATAG                               | Gateway cloning of amiRNAb                                  | FWD       |
| LOG2 miRb* r       | GAATAAGGATTTACGAAAAGTGTCTACATATATATCTCT                             | Gateway cloning of amiRNAb                                  | REV       |
| LOG2 miRc f        | GATGTTACGAATCGTTACGCTTTCTCTTTTGTATTCC                               | Gateway cloning of amiRNAb                                  | FWD       |
| LOG2 miRc r        | GAAGGCGTAAACGATTCGTAACATCAAGAGAATCAATGA                             | Gateway cloning of amiRNAb                                  | REV       |
| LOG2 miRc* f       | GAATAAGGATTTACGAAAAGTGTCTACATATATATCTCT                             | Gateway cloning of amiRNAb                                  | FWD       |
| LOG2 miRc* r       | GAAGTTACGATCGTTACGCTTTTCTACATATATATCTCT                             | Gateway cloning of amiRNAb                                  | REV       |
| LOG2 miRd f        | GATTAACCATAGTGTCCGCTTTCTCTTTTGTATTCC                                | Gateway cloning of amiRNAd                                  | FWD       |
| LOG2 miRd r        | GAAGGCGGACACTATGGGTTAAATCAAGAGAATCAATGA                             | Gateway cloning of amiRNAd                                  | REV       |
| LOG2 miRd* f       | GAATAAGGATTTACGAAAAGTGTCTACATATATATCTCT                             | Gateway cloning of amiRNAd                                  | FWD       |
| LOG2 miRd* r       | GAATAAGGATTTACGAAAAGTGTCTACATATATATCTCT                             | Gateway cloning of amiRNAd                                  | REV       |
| GDU1 180 attB1     | GGGGACAAGTTTGTACAAAAAAGCAGGCTTAATGGCGCTGTCTCTCCCG                   | Gateway cloning of cGDU1                                    | FWD       |
| GDU1 stop attB2    | GGGGACCACCTTTGTACAAGAAAGCTGGGTATTAGTACTGATAGTTGCT                   | Gateway cloning of cGDU1 / GDU1 with stop                   | REV       |
| GDU1 no stop attB2 | GGGGACCACCTTTGTACAAGAAAGCTGGGTAGTACTGATAGTTGCT                      | Gateway cloning of cGDU1 / GDU1 without stop                | REV       |
| GDU2 170 attB1     | GGGGACAAGTTTGTACAAAAAAGCAGGCTTAATGAGACTCTCCGGCTCCGCT                | Gateway cloning of cGDU2                                    | FWD       |
| GDU2 stop attB2    | GGGGACCACCTTTGTACAAGAAAGCTGGGTACTACCTCTCTCTCTCT                     | Gateway cloning of cGDU2                                    | REV       |
| GDU3 170 attB1     | GGGGACAAGTTTGTACAAAAAAGCAGGCTTAATGGCGTCTCCGGTATCTA                  | Gateway cloning of cGDU3                                    | FWD       |
| GDU3 stop attB2    | GGGGACCACCTTTGTACAAGAAAGCTGGGTATCAATGTCTCACCGTT                     | Gateway cloning of cGDU3                                    | REV       |
| GDU4 190 attB1     | GGGGACAAGTTTGTACAAAAAAGCAGGCTTAATGGCGTGTCAACCTCC                    | Gateway cloning of cGDU4                                    | FWD       |
| GDU4 stop attB2    | GGGGACCACCTTTGTACAAGAAAGCTGGGTACTCACTGACTCGTTGTTTC                  | Gateway cloning of cGDU4                                    | REV       |
| GDU5 170 attB1     | GGGGACAAGTTTGTACAAAAAAGCAGGCTTAATGAGGCTCTCGGGCAGACA                 | Gateway cloning of cGDU5                                    | FWD       |
| GDU5 stop attB2    | GGGGACCACCTTTGTACAAGAAAGCTGGGTACTAGTGGTCTCTCTGTACTT                 | Gateway cloning of cGDU5                                    | REV       |
| GDU6 120 attB1     | GGGGACAAGTTTGTACAAAAAAGCAGGCTTAATGAAACCTTCTCTCTAGC                  | Gateway cloning of cGDU6                                    | FWD       |
| GDU6 stop attB2    | GGGGACCACCTTTGTACAAGAAAGCTGGGTATTAGGTTGAGATGACAGT                   | Gateway cloning of cGDU6                                    | REV       |
| GDU7 150 attB1     | GGGGACAAGTTTGTACAAAAAAGCAGGCTTAATGGCATAAGCAAACTCGAATTATCG           | Gateway cloning of cGDU7                                    | FWD       |
| GDU7 stop attB2    | GGGGACCACCTTTGTACAAGAAAGCTGGGTATCATGCAATGATCGGGT                    | Gateway cloning of cGDU7                                    | REV       |
| GDU1 ATG attB1     | GGGGACAAGTTTGTACAAAAAAGCAGGCTTAATGAGACCATGAGCGGTA                   | Gateway cloning of GDU1                                     | FWD       |
| MGRN1 ATG attB1    | GGGGACAAGTTTGTACAAAAAAGCAGGCTTAATGGGCTCAATCTCACG                    | Gateway cloning of HsMGRN1                                  | FWD       |
| MGRN1 stop attB2   | GGGGACCACCTTTGTACAAGAAAGCTGGGTACTCAGAGTGGGTCAGCTC                   | Gateway cloning of HsMGRN1                                  | REV       |
| LOG2 ATG attB1     | GGGGACAAGTTTGTACAAAAAAGCAGGCTTAATGGGAAACATTAGCAGCAGCGG              | Gateway cloning of LOG2                                     | FWD       |
| LOG2 stop attB2    | GGGGACCACCTTTGTACAAGAAAGCTGGGTACTACTCTGTGTTCAACTGTTT                | Gateway cloning of LOG2 with stop                           | REV       |
| LOG2 no stop attB2 | GGGGACCACCTTTGTACAAGAAAGCTGGGTACTCTGTGTTCAACTGTTT                   | Gateway cloning of LOG2 without stop                        | REV       |
| LUL1 ATG attB1     | GGGGACAAGTTTGTACAAAAAAGCAGGCTTAATGGGAAATCTGATCAGT                   | Gateway cloning of LUL1                                     | FWD       |
| LUL1 stop attB2    | GGGGACCACCTTTGTACAAGAAAGCTGGGTATCATCCGTTCTGTTAACTCCAA               | Gateway cloning of LUL1                                     | REV       |
| LUL2 ATG attB1     | GGGGACAAGTTTGTACAAAAAAGCAGGCTTAATGGGCAATGTCATAAGC                   | Gateway cloning of LUL2                                     | FWD       |
| LUL2 stop attB2    | GGGGACCACCTTTGTACAAGAAAGCTGGGTACTAGTCTGCTGTTGTT                     | Gateway cloning of LUL2                                     | REV       |
| LUL3 ATG attB1     | GGGGACAAGTTTGTACAAAAAAGCAGGCTTAATGGGATCTCCCTAAAGC                   | Gateway cloning of LUL3                                     | FWD       |
| LUL3 stop attB2    | GGGGACCACCTTTGTACAAGAAAGCTGGGTATCATGTTGTTGATCACT                    | Gateway cloning of LUL3                                     | REV       |
| LUL4 ATG attB1     | GGGGACAAGTTTGTACAAAAAAGCAGGCTTAATGGGAACTCCCTTATAGC                  | Gateway cloning of LUL4                                     | FWD       |
| LUL4 stop attB2    | GGGGACCACCTTTGTACAAGAAAGCTGGGTACTAGTGTGTTGATCACT                    | Gateway cloning of LUL4                                     | REV       |
|                    | ACCGCCGAGAGGTAAGGAA                                                 | GDU1 real-time PCR (A)                                      | REV       |
|                    | CCGTTAATCACACGGAGTGA                                                | GDU1 real-time PCR (S)                                      | FWD       |
|                    | CTTCTCTAATTTACCTCCAGC                                               | Genotyping gdu1-1D                                          | FWD       |
|                    | AAGAGGCGACCAATCACCAACG                                              | Genotyping gdu1-1D                                          | REV       |
|                    | TCCTCTCCGGTGTATTTCCCGC                                              | Genotyping log2-2                                           | FWD       |
|                    | TGCAACCGTCTCCGGAAGGTAGAT                                            | Genotyping log2-2                                           | REV       |
| MGRN1 R            | GGGGACCACCTTTGTACAAGAAAGCTGGGTCTTACTCTCTATACCAACAGAGCAGC            | Isolation of MGRN1 from Rat cDNA                            | REV       |
| MGRN1 F            | GGGGACAAGTTTGTACAAAAAAGCAGGCTCGATGGGCTCCATCTGATGTCGC                | Isolation of MGRN1 from Rat cDNA                            | FWD       |
|                    | AAGGAGTCTCTTAGGCTTGAACC                                             | LOG2 semi-quantitative RT-PCR                               | FWD       |
|                    | ACCAGGATCATTAGCATCATCAG                                             | LOG2 semi-quantitative RT-PCR                               | REV       |
| Act2 Q f           | GGTAACATTGTGCTCAGTGGTGG                                             | qPCR Actin2                                                 | FWD       |
| Act2 Q r           | AACGACCTTAATCTTCACTGCTGC                                            | qPCR Actin2                                                 | REV       |
| GDU1 Qf            | ATGGCCGGAGAAGATTGTC                                                 | qPCR GDU1                                                   | FWD       |
| GDU1 Qr            | CGCTCTCTCATCTCTCTCC                                                 | qPCR GDU1                                                   | REV       |
| LOG2 +800 f        | TTCCGAAAGGACTTGGTCAGA                                               | qPCR LOG2                                                   | FWD       |
| LOG2 +900 r        | CTGCCTAACCCCTAATGGATA                                               | qPCR LOG2                                                   | REV       |
|                    | GGGGACCACCTTTGTACAAGAAAGCTGGGTCTCTGTTCAACTGTTTCTCCC                 | Remove STOP codon from LOG2                                 | FWD       |
| UBQ10sqPCR F       | TCAATTCCTCTACCGTGATCAAG                                             | Semi-quantitative PCR amplification of UBQ10                | FWD       |
| UBQ10sqPCR R       | TTACATGAAACGAAACATTGAACCTC                                          | Semi-quantitative PCR amplification of UBQ10                | REV       |
| ADH 3' r           | ATACCTGAGAAAGCAACTGACCTA                                            | Sequencing cGDU1 in Y2H vector                              | REV       |
| GAL4 DB f          | ATAGAATAAGTGCAGCATCATCATC                                           | Sequencing cGDU1 in Y2H vector                              | FWD       |
|                    | CTTTTCTCCATATTGACCATCATC                                            | Sequencing gdu1-1D SKI105 T-DNA junction                    | FWD       |
| GAL4 Act f         | AATACCCTACTCAATGGATGATG                                             | Sequencing inserts in pACT / pACT2                          | FWD       |
| GAL4 r             | ATGAAGAATAATGAGATGGTG                                               | Sequencing inserts in pACT / pACT2                          | REV       |
| pDONR F            | GTTGTAAAACGACGGCCAGT                                                | Sequencing inserts in pDONR 221 / Zeo                       | FWD       |
| pDONR r            | GCTGCCAGAAACAGCTATGA                                                | Sequencing inserts in pDONR 221 / Zeo                       | REV       |
| LOG2 -1650 f       | CACACTCTCGATGGGAAT                                                  | Sequencing LOG2 promoter                                    | FWD       |
| LOG2 -2350 f       | ATTCTCTATTACGAAACCACA                                               | Sequencing LOG2 promoter                                    | REV       |
|                    | TGCGGTTAACGTAAGCATGGATCTC                                           | Sequencing pDONR 201 insert                                 | FWD       |
|                    | ACGGGCGAGAGCTGAGCTG                                                 | Sequencing pDONR 201 insert                                 | REV       |
|                    | CGTATTAATGTATAATCGGGGAC                                             | Sequencing pGWB construct                                   | REV       |
| pJH f              | CCAGGCTTACACTTTATGCTTCC                                             | Sequencing RIG2 promoter in pUTkan                          | FWD       |
| Rbcs +60 r         | TGCCATAACTCAAACTCAG                                                 | Sequencing RIG2 promoter in pUTkan                          | REV       |
|                    | CAGACAATCGAGCACCCATTGCAAGGCAACCTGTGAAAGGC                           | Site-Directed Mutagenesis of LOG2 CC54/357AA                | FWD       |

|             |                                                                    |                                                        |     |
|-------------|--------------------------------------------------------------------|--------------------------------------------------------|-----|
|             | GCCTTCAACAGGTTGCTTCAATGGGCTCGATTGTCTG                              | Site-Directed Mutagenesis of LOG2 CC354/357AA          | REV |
|             | GGGGACAAGTTTGTACAAAAAAGCAGGCTCGAAGGAGATACATATGGCGAACA TTAGCAGCAG C | Site-Directed Mutagenesis of LOG2 G2A                  | FWD |
| LOG2        | GACAAGTTTGTACAAAAAAGCAGGCTTAATGGCAAACTTAGCAGCAGCGG                 | Site-Directed Mutagenesis of LOG2 G2A, gateway cloning | FWD |
| LOG2        | GCGGTGGTGAAGGTAACCGCCTCGACGGCGAAAC                                 | Site-Directed Mutagenesis of LOG2 R12K                 | FWD |
|             | CAGACAAATCTGGCACCAGTTGCAAGACAACCTGTTGAGATGC                        | Site-Directed Mutagenesis of LUL1 CC320/323AA          | FWD |
|             | GCATCTCAACAGGTTGCTTGCACACTGGTCCAGATTGTCTG                          | Site-Directed Mutagenesis of LUL1 CC320/323AA          | REV |
| I-040.s f   | GGCTTTCTGAAATCTGTCC                                                | SSLP genetic marker chr I                              | FWD |
| I-040.s r   | TTACTTTTGTCTCTGTCAATG                                              | SSLP genetic marker chr I                              | REV |
| I-123.s f   | AGGTTTTATTGCTTTTCAACA                                              | SSLP genetic marker chr I                              | FWD |
| I-123.s r   | CTTTCAAAAGCACATCACA                                                | SSLP genetic marker chr I                              | REV |
| I-234.s f   | ACATTTTCTCAATCCTTACTC                                              | SSLP genetic marker chr I                              | FWD |
| I-234.s r   | GAGAGCTTCTTATTGTGAT                                                | SSLP genetic marker chr I                              | REV |
| I-267.s f   | CTGATCTCACGGACAATAGTGC                                             | SSLP genetic marker chr I                              | FWD |
| I-267.s r   | GGCTCCATAAAAAGTGACC                                                | SSLP genetic marker chr I                              | REV |
| I-353.s f   | CTCCAGTTGGAAGCTAAAGGG                                              | SSLP genetic marker chr I                              | FWD |
| I-353.s r   | TGTTTTTAAAGCAAAATGGCG                                              | SSLP genetic marker chr I                              | REV |
| II-016.s f  | CCCAAAAGTTAATTATACTGT                                              | SSLP genetic marker chr II                             | FWD |
| II-016.s r  | CCGGGTTAATAATAAATGT                                                | SSLP genetic marker chr II                             | REV |
| II-088.s f  | GAAACTCAATGAAATCCACTT                                              | SSLP genetic marker chr II                             | FWD |
| II-088.s r  | TGAACTTGTGTGAGCTTTGA                                               | SSLP genetic marker chr II                             | REV |
| II-157.s f  | CGCTACGCTTTTCGGTAAAG                                               | SSLP genetic marker chr II                             | FWD |
| II-157.s r  | GCACAGTCCAAAGTCAACAAC                                              | SSLP genetic marker chr II                             | REV |
| II-212.s f  | TCGTCTACTGCACTGCCG                                                 | SSLP genetic marker chr II                             | FWD |
| II-212.s r  | GAGGACATGTATAGGAGCTCG                                              | SSLP genetic marker chr II                             | REV |
| III-013.s f | AGCTGCTTCTTATAGCGTCC                                               | SSLP genetic marker chr III                            | FWD |
| III-013.s r | CATCCGAATGCCAATTTTC                                                | SSLP genetic marker chr III                            | REV |
| III-028.s f | CCTCGTTCTTGAAGTTGTATCCA                                            | SSLP genetic marker chr III                            | FWD |
| III-028.s r | CAAAAGTTATGAGTTTCTGAGGGAT                                          | SSLP genetic marker chr III                            | REV |
| III-044.s f | GAAAAAAGCCTACTTTCGTGG                                              | SSLP genetic marker chr III                            | FWD |
| III-044.s r | CAGAGCAATATCAAGAGCAGC                                              | SSLP genetic marker chr III                            | REV |
| III-048.s f | TGCTCGTATCAACACAGGTA                                               | SSLP genetic marker chr III                            | FWD |
| III-048.s r | ATGGGGATTTCTGGATAAGTTG                                             | SSLP genetic marker chr III                            | REV |
| III-067.s f | CATGCAATTTGCATCTGAGG                                               | SSLP genetic marker chr III                            | FWD |
| III-067.s r | CTCTGTCACTCTTTCTCTGG                                               | SSLP genetic marker chr III                            | REV |
| III-079.s f | TAACACACACATCGTGTTTTGTCC                                           | SSLP genetic marker chr III                            | FWD |
| III-079.s r | GGGTCTGCTACTTCTCAGTTCTGT                                           | SSLP genetic marker chr III                            | REV |
| III-098.s f | AAGAGAAATATGTCGCTCCAAA                                             | SSLP genetic marker chr III                            | FWD |
| III-098.s r | AGAATAACGTAGTCTCTACCAA                                             | SSLP genetic marker chr III                            | REV |
| III-156.s f | CCCCGAGTTGAGGTATT                                                  | SSLP genetic marker chr III                            | FWD |
| III-156.s r | GAAGAAATCTTAAAGCATT                                                | SSLP genetic marker chr III                            | REV |
| III-284.s f | GTTTATTAACTTGGCGTGTG                                               | SSLP genetic marker chr III                            | FWD |
| III-284.s r | TACGGTCAGATTGAGTGATTC                                              | SSLP genetic marker chr III                            | REV |
| III-331.s f | TGGAATTTCTCTCTCTCAC                                                | SSLP genetic marker chr III                            | FWD |
| III-331.s r | ATGAGAGAAGCTTACACTGATC                                             | SSLP genetic marker chr III                            | REV |
| IV-013.s f  | GGTTAAAAAATAGGGTTACGA                                              | SSLP genetic marker chr IV                             | FWD |
| IV-013.s r  | AGATTTACGTGGAAAGCAAT                                               | SSLP genetic marker chr IV                             | REV |
| IV-105.s f  | CTCGTAGTGCATTTTCATCA                                               | SSLP genetic marker chr IV                             | FWD |
| IV-105.s r  | CACATGGTTAGGGAACAATA                                               | SSLP genetic marker chr IV                             | REV |
| IV-126.s f  | AATTTGGAGATTAGCTGGAAT                                              | SSLP genetic marker chr IV                             | FWD |
| IV-126.s r  | CCATGTTGATGATAAGCACA                                               | SSLP genetic marker chr IV                             | REV |
| IV-207.s f  | GCGAAAAAACAATAAATCCA                                               | SSLP genetic marker chr IV                             | FWD |
| IV-207.s r  | CGACGAATCGACAGAAATTAGG                                             | SSLP genetic marker chr IV                             | REV |
| V-012.s f   | CCACTGTTTCTCTCTAG                                                  | SSLP genetic marker chr V                              | FWD |
| V-012.s r   | TATCAACAGAAACGCCAGG                                                | SSLP genetic marker chr V                              | REV |
| V-066.s f   | GTTTTGGGAAGTTTGTCTGG                                               | SSLP genetic marker chr V                              | FWD |
| V-066.s r   | CAGTCTAAAAGCAGAGTATGATG                                            | SSLP genetic marker chr V                              | REV |
| V-105.s f   | TAGTGAACCTTCTCAGAT                                                 | SSLP genetic marker chr V                              | FWD |
| V-105.s r   | TTATGTTTCTCAATCAGTT                                                | SSLP genetic marker chr V                              | REV |
| V-120.s f   | TTAGTTGAAGTTTTATTTGGGAA                                            | SSLP genetic marker chr V                              | FWD |
| V-120.s r   | AGCAAAATGAAAGTCAAGATGAA                                            | SSLP genetic marker chr V                              | REV |
| V-138.s f   | AATTTGGGAAGGACAACAACCAA                                            | SSLP genetic marker chr V                              | FWD |
| V-138.s r   | GAGAGAGGACGTGAGATGTCACAGA                                          | SSLP genetic marker chr V                              | REV |
| V-156.s f   | GAATCTCAACCTGTAATAAAGTGT                                           | SSLP genetic marker chr V                              | FWD |
| V-156.s r   | CTTCATCACTCAGTTCTGTCCA                                             | SSLP genetic marker chr V                              | REV |
| V-182.s f   | CTCTACTTACTTATGTTTTGT                                              | SSLP genetic marker chr V                              | FWD |
| V-182.s r   | AAATCATTGTCGTATATGTTCCA                                            | SSLP genetic marker chr V                              | REV |
| V-195.s f   | CTCAGAGAATCCAGAAAAATCT                                             | SSLP genetic marker chr V                              | FWD |
| V-195.s r   | AAACTCGAGAGTTTGTCTAGATC                                            | SSLP genetic marker chr V                              | REV |
| V-249.s f   | CAGACGTATCAAATGACAAATG                                             | SSLP genetic marker chr V                              | FWD |
| V-249.s r   | GACTACTGCTCAAATCTCGG                                               | SSLP genetic marker chr V                              | REV |
| V-359.s f   | CCGACTACCGCAAAATAGAATACGAAA                                        | SSLP genetic marker chr V                              | FWD |
| V-359.s r   | GTCAACCCACATACACGCCACATACATA                                       | SSLP genetic marker chr V                              | REV |
| V-378.s f   | CCACATTTCTCTTTTCTATA                                               | SSLP genetic marker chr V                              | FWD |
| V-378.s r   | CAACATTTAGCAATCAACTT                                               | SSLP genetic marker chr V                              | REV |

### Supplemental Text S1: EMS mutagenesis and positional cloning

About 22,000 seeds from recapitulation line *gdu1-5D* (Pilot et al., 2004, construct E2), containing two T-DNAs inserted in tandem in the 3' region of gene AT5G09340, were mutagenized and screened as previously described (Pratelli and Pilot, 2006). The *log2-1* mutation was positioned in the genome from analysis of 97 *Gdu1D* progenies from a cross between the *log2-1 gdu1-5D* double mutant (in the Col-7 background) and *Ler*, using single sequence length polymorphism markers obtained from the Monsanto polymorphism release (Jander et al., 2002), Bell and Ecker (1994), Kwon et al. (2005), Lukowitz et al. (2000) and Jander (2006).

### Supplemental Text S2: LC-MS analysis details

For LC-MS/MS, an Agilent 1200 series HPLC system, employing an Agilent Xorbax Eclipse XDB-C18 4.6x50mM 1.8 micron column was used. Ion pairing chromatography was performed using solvent A consisting of 0.1% formic acid and 0.05% heptafluorobutyric acid in water and solvent B consisting of 0.1% formic acid and 0.05% heptafluorobutyric acid in acetonitrile. The step gradient was:

| Step | Total time (min) | Flow rate ( $\mu$ l/min) | A (%) | B (%) |
|------|------------------|--------------------------|-------|-------|
| 0    | 0.10             | 1000                     | 98.0  | 2.0   |
| 1    | 2.30             | 1000                     | 80.0  | 20.0  |
| 2    | 4.00             | 1000                     | 60.0  | 40.0  |
| 3    | 4.10             | 1000                     | 98.0  | 2.0   |
| 4    | 6.00             | 1000                     | 98.0  | 2.0   |

Column effluent was then analyzed by admission into an AB Sciex 3200 QTrap tandem mass spectrometer fitted with a Turbo V ion source operated with the following conditions:

|                        |        |
|------------------------|--------|
| Curtain Gas Pressure:  | 35 psi |
| Ion Spray Voltage:     | 5500 V |
| Turbo Gas Temperature: | 600°C  |
| Gas 1 Pressure:        | 60 psi |
| Gas 2 Pressure:        | 60 psi |
| Entrance Potential:    | 10 V   |

Declustering Potentials, Collision Entrance Potentials, and Collision Energies were individually optimized for the various analytes, based in parameters published by Gu et al. (2007).

## References:

- Bell CJ, Ecker JR** (1994) Assignment of 30 microsatellite loci to the linkage map of Arabidopsis. *Genomics* **19**: 137-144
- Gu L, Jones AD, Last RL** (2007) LC-MS/MS assay for protein amino acids and metabolically related compounds for large-scale screening of metabolic phenotypes. *Anal Chem* **79**: 8067-8075
- Jander G** (2006) Gene identification and cloning by molecular marker mapping *In* J Salinas, JJ Sanchez-Serrano, eds, *Arabidopsis Protocols*, Vol 323. Humana Press, New York, pp 115-126
- Jander G, Norris SR, Rounsley SD, Bush DF, Levin IM, Last RL** (2002) Arabidopsis map-based cloning in the post-genome era. *Plant Physiol* **129**: 440-450
- Kwon M, Lee HK, Choe S** (2005) Novel simple sequence length polymorphism (SSLP) markers for positional cloning in *Arabidopsis thaliana*. *Korean J Genetics* **27**: 1-8
- Lukowitz W, Gillmor CS, Scheible WR** (2000) Positional cloning in Arabidopsis. Why it feels good to have a genome initiative working for you. *Plant Physiol* **123**: 795-805
- Pilot G, Stransky H, Bushey DF, Pratelli R, Ludewig U, Wingate VP, Frommer WB** (2004) Overexpression of GLUTAMINE DUMPER1 leads to hypersecretion of glutamine from hydathodes of Arabidopsis leaves. *Plant Cell* **16**: 1827-1840
- Pratelli R, Pilot G** (2006) The plant-specific VIMAG domain of Glutamine Dumper1 is necessary for the function of the protein in Arabidopsis. *FEBS Lett* **580**: 6961-6966
